# Supplementary material
Source: HighWire-hosted journal article supplement (https://erj.ersjournals.com/content/56/6/2001387)
Supplement: inline-supplementary-material-1 [file inline-supplementary-material-1.pdf]

## ONLINE SUPPLEMENT

### **The Effect of Pain Conditioning on Experimentally Evoked Cough: Evidence of Impaired Endogenous Inhibitory Control Mechanisms in Refractory Chronic Cough**

\*Emma Hilton MB BS PhD<sup>1</sup>, \*Imran Satia MA MB BChir PhD<sup>2,3</sup>, Kimberley Holt MPhil<sup>2,4</sup>, Ashley A Woodcock M.D<sup>2,4</sup>, John Belcher<sup>4</sup>, Jaclyn A Smith MB ChB PhD<sup>2,4</sup>

#### **Author affiliations:**

1. University of Manchester, Division of Infection, Immunity and Respiratory Medicine, and Manchester Academic Health Science Centre, Manchester, UK
2. McMaster University, Department of Medicine, Division of Respiriology
3. Manchester University NHS Foundation Trust, Manchester, UK

\*Equal contributors

## **METHODS:**

### **Study Questionnaires:**

At the screening visit, a series of psychological questionnaires were completed by participants under guided supervision. These included:

(i) State-Trait Anxiety Index (STAI)

(ii) Hospital Anxiety and Depression Scale (HADS)

(iii) Perceived Stress Scale (PSS): validated to measure the degree to which situations are appraised as stressful and assesses recent (<1 month) stress levels.

(iv) Pain Catastrophising Scale (PCS): a validated self-report scale assessing the individual's tendency towards pain catastrophizing. Pain catastrophising has been characterized as "the tendency to magnify the threat value of pain stimulus and to feel helpless in the context of pain, and by a relative inability to inhibit pain-related thoughts in anticipation of, during or following a painful encounter"[1]. Negative correlations between DNIC effect and pain catastrophising score have been shown in healthy subjects[2].

(v) Anxiety Sensitivity Index (ASI): measures the individual's fear of bodily sensations that are interpreted as having potentially harmful physical or psychological consequences.

(vi) Body Vigilance Scale (BVS): measures the tendency to attend to or focus on internal body sensations.

(vii) IBS sub-section of the ROME III questionnaire). Healthy subjects were excluded if they met the criteria for a diagnosis of IBS because DNIC are known to be impaired in IBS patients[3, 4].

(viii) Sino-nasal Outcome Test

(ix) Reflux Symptom questionnaire to determine whether they were symptomatic of reflux disease or post-nasal drip syndrome.

(x) Chronic cough patients completed a Cough-Specific Quality of Life questionnaire to indicate the degree to which the cough was impacting on quality of life, as a marker of cough severity.

## **RESULTS:**

### **Psychological Questionnaires:**

Compared to HC, CC patients had significantly higher hospital anxiety and depression (HAD) scores for depression ( $p=0.001$ ) and anxiety ( $p=0.002$ ), state anxiety ( $p=0.022$ ), trait anxiety ( $p=0.003$ ) and anxiety sensitivity index ( $p=0.007$ ). However, there were no significant group differences for perceived stress ( $p=0.086$ ), body vigilance ( $p=0.057$ ) or pain catastrophising ( $p=0.138$ ) despite a trend towards higher scores in CC patients (Table E1).

**TABLE E1: Comparison of questionnaire scores between healthy controls and patients with chronic cough.** HADS-a = Hospital Anxiety and Depression scale for anxiety, HADS-d for depression. Mean (SD)\* or median (IQR)\*\* shown.

| Questionnaire               | Healthy Controls (HC) | Chronic Cough (CC) | p-value |
|-----------------------------|-----------------------|--------------------|---------|
| HADS-d*                     | 1.90 (1.65)           | 4.9 (3.58)         | 0.001   |
| HADS-a*                     | 3.25 (3.19)           | 7.40 (4.42)        | 0.002   |
| State anxiety**             | 23.00 (5.75)          | 28.50 (14.0)       | 0.022   |
| Trait anxiety**             | 28.00 (6.75)          | 44.50 (20.75)      | 0.003   |
| Perceived stress*           | 10.9 (6.08)           | 15.15 (8.86)       | 0.086   |
| Body vigilance*             | 11.85 (6.86)          | 15.95 (6.31)       | 0.057   |
| Pain catastrophising*       | 13.8 (11.26)          | 18.80 (9.55)       | 0.138   |
| Anxiety sensitivity index** | 9.50 (7.25)           | 18.50 (14.75)      | 0.007   |

**Table E2: Changes in blood pressure and pulse rate before and after each intervention block.**  
**Mean (SD) shown.**

| <b>Intervention</b>                                 | <b>Healthy Controls (HC)</b> | <b>Chronic cough (CC)</b> | <b>p-value</b> |
|-----------------------------------------------------|------------------------------|---------------------------|----------------|
| <b>Change in systolic blood pressure (mmHg)</b>     |                              |                           |                |
| <b>No intervention</b>                              | -3.35 (5.41)                 | -1.65 (5.62)              | 0.336          |
| <b>Warm water</b>                                   | -0.85 (3.88)                 | 1.40 (9.27)               | 0.326          |
| <b>Cold water</b>                                   | 2.30 (9.95)                  | 1.20 (6.41)               | 0.680          |
| <b>Suppression</b>                                  | -0.85 (9.37)                 | -2.10 (11.37)             | 0.706          |
| <b>Change in pulse rate (beats per minute, bpm)</b> |                              |                           |                |
| <b>No intervention</b>                              | 0.40 (4.12)                  | 3.20 (8.02)               | 0.176          |
| <b>Warm water</b>                                   | 0.40 (5.80)                  | 1.10 (5.89)               | 0.707          |
| <b>Cold water</b>                                   | -0.60 (6.63)                 | -0.15 (6.00)              | 0.823          |
| <b>Suppression</b>                                  | -0.25 (5.50)                 | 0.70 (9.34)               | 0.697          |

## REFERENCES:

1. Quartana PJ, Campbell CM, Edwards RR. Pain catastrophizing: a critical review. *Expert Rev Neurother* 2009; 9(5): 745-758.
2. Weissman-Fogel I, Sprecher E, Pud D. Effects of catastrophizing on pain perception and pain modulation. *Exp Brain Res* 2008; 186(1): 79-85.
3. Wilder-Smith CH, Schindler D, Lovblad K, Redmond SM, Nirkko A. Brain functional magnetic resonance imaging of rectal pain and activation of endogenous inhibitory mechanisms in irritable bowel syndrome patient subgroups and healthy controls. *Gut* 2004; 53(11): 1595-1601.
4. Heymen S, Maixner W, Whitehead WE, Klatzkin RR, Mechlin B, Light KC. Central processing of noxious somatic stimuli in patients with irritable bowel syndrome compared with healthy controls. *Clin J Pain* 2010; 26(2): 104-109.
